# Supplementary material
Source: PubMed Central journal article supplement (PMC6911685)

## KPB25L Lines

**A** A p o b e c 3  
Reads Spanning Ex on 4 to 6

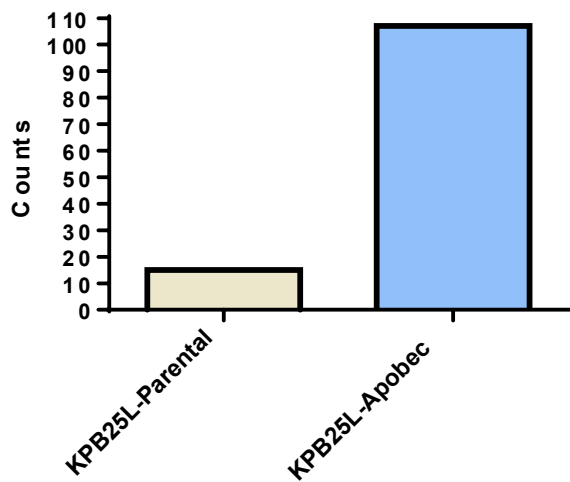

**B** Proliferation Cluster  
Fan et al. 2011. BMC Med Genomics

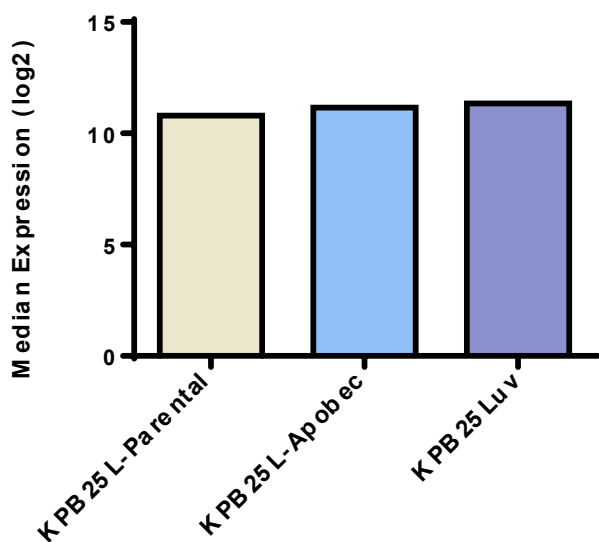

**C** Cell Counts

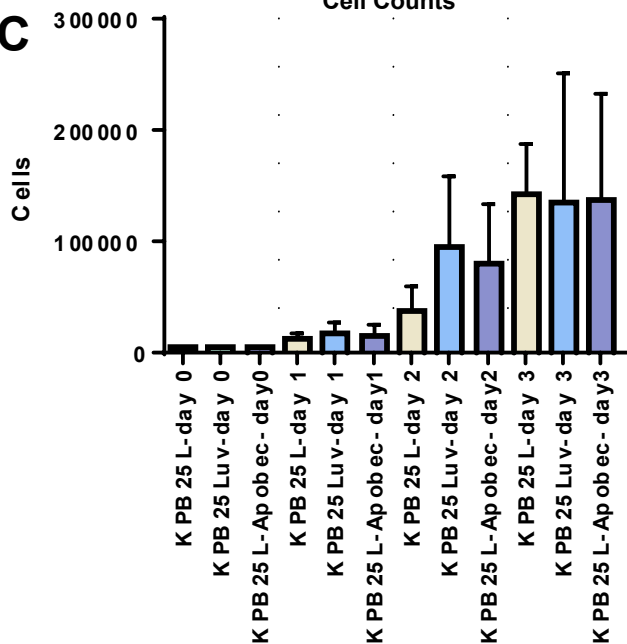

## T11 Lines

**D** A p o b e c 3  
Reads Spanning Ex on 4 to 6

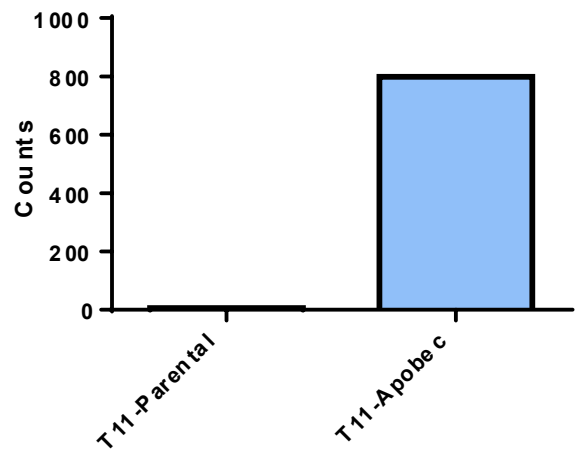

**E** Proliferation Cluster  
Fan et al. 2011. BMC Med Genomics

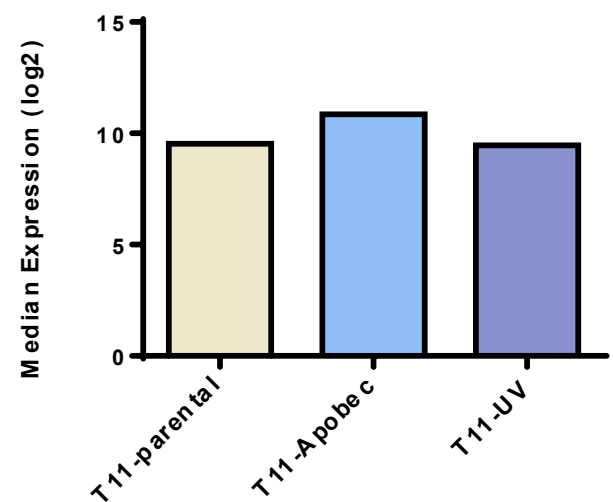

**F** Cell Counts

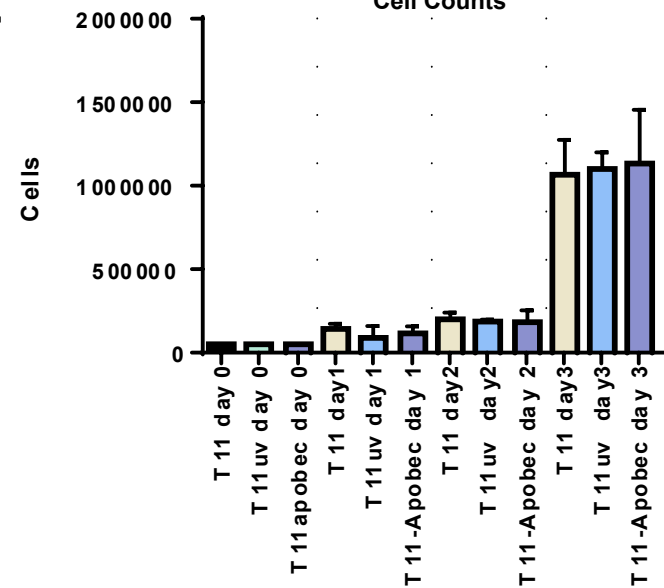

Supplement: NIHMS1542054-supplement-2.pdf [file NIHMS1542054-supplement-2.pdf]
