# Supplementary material
Source: PubMed Central journal article supplement (PMC6911685)

# Single Cell mRNA-Seq 7 Day aPD1/aCTLA4 Treated T11-Apobec tumors

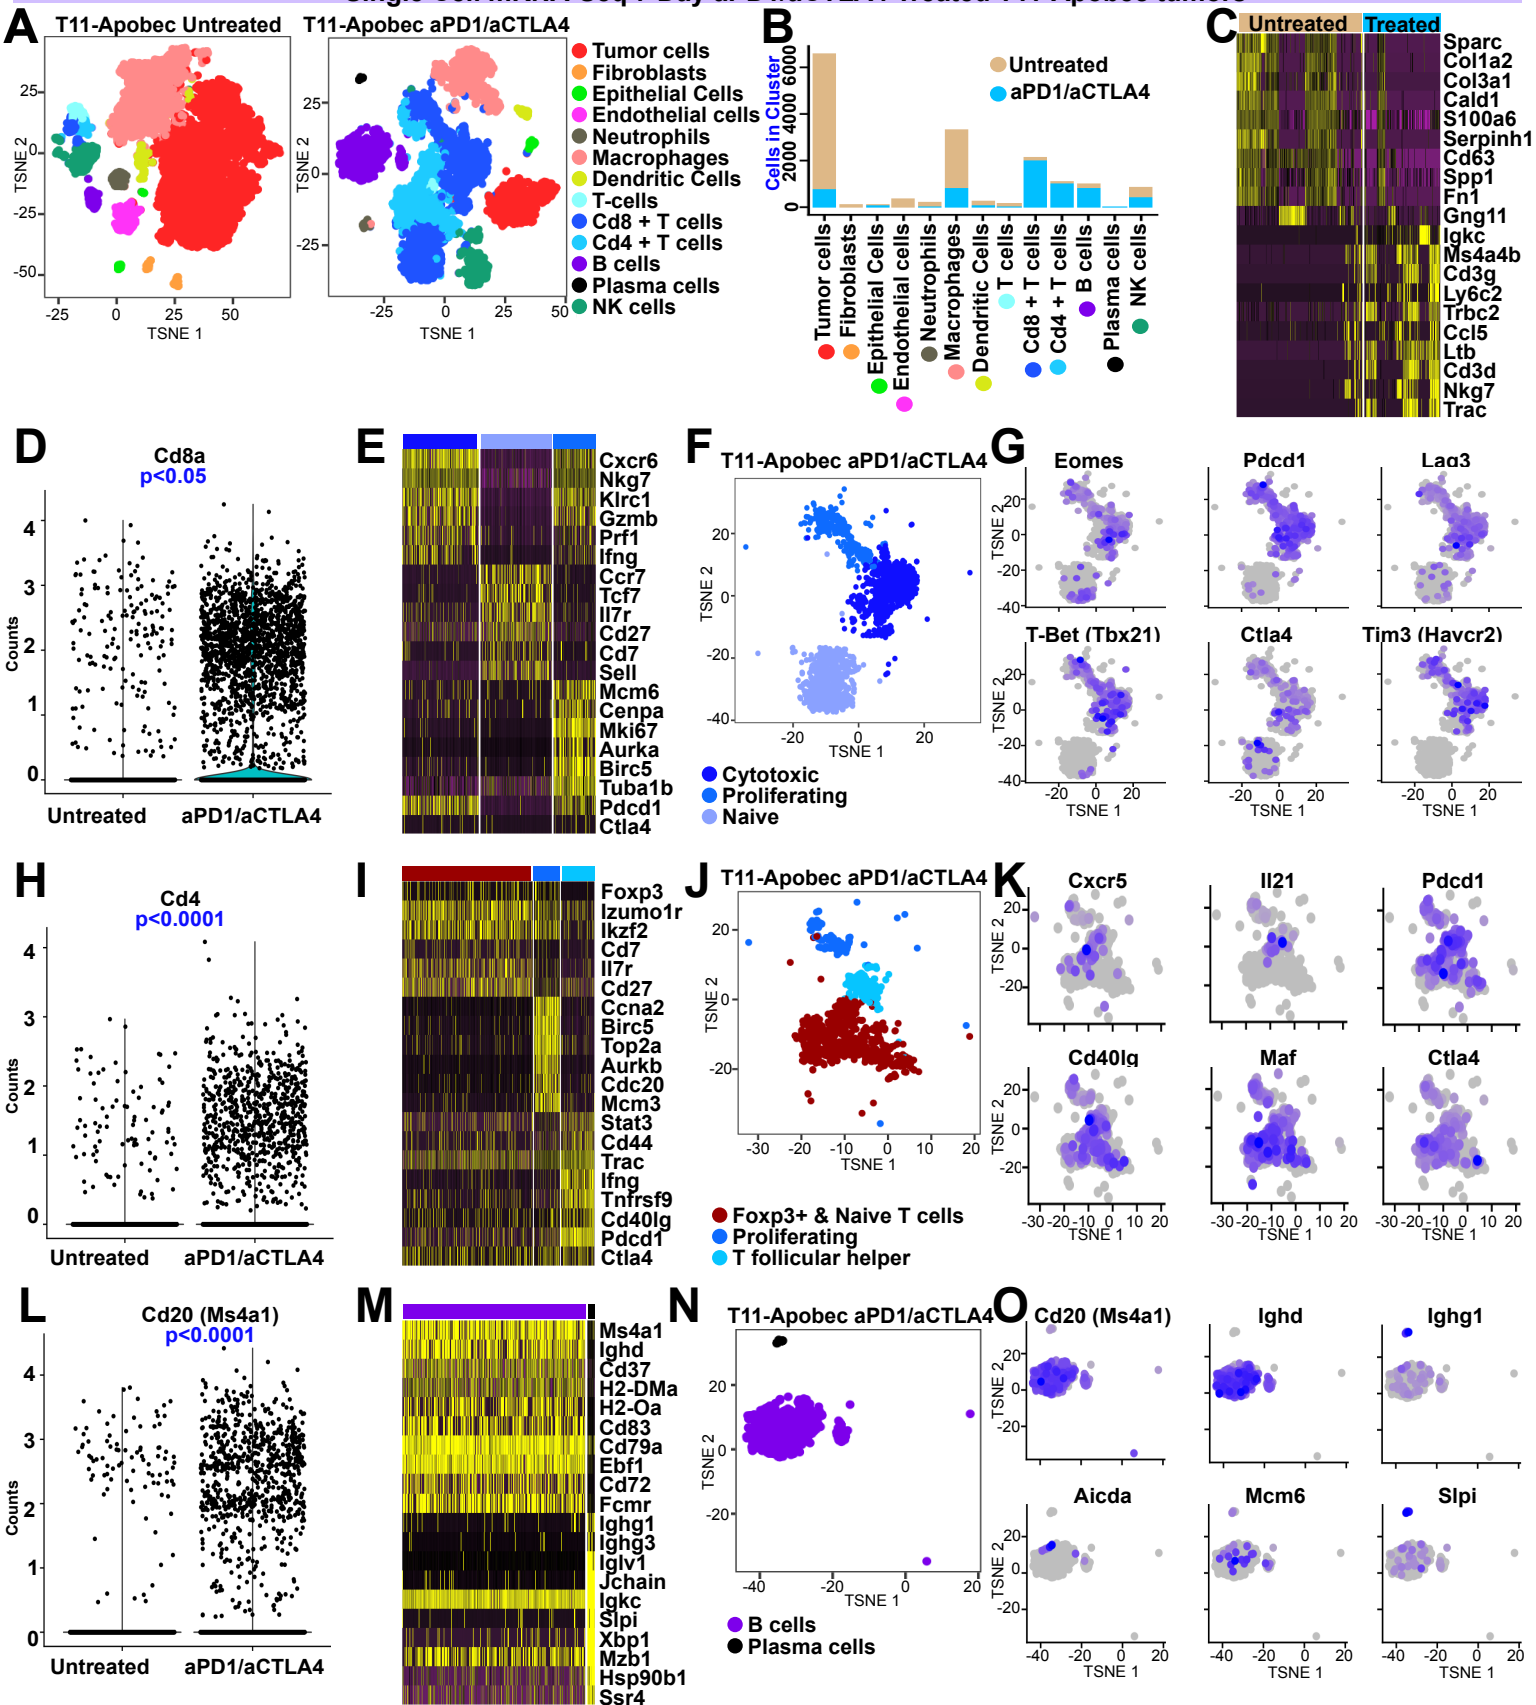

## P 5' TCR/BCR Seq on 7 Day aPD1/aCTLA4 Treated T11-Apobec tumors

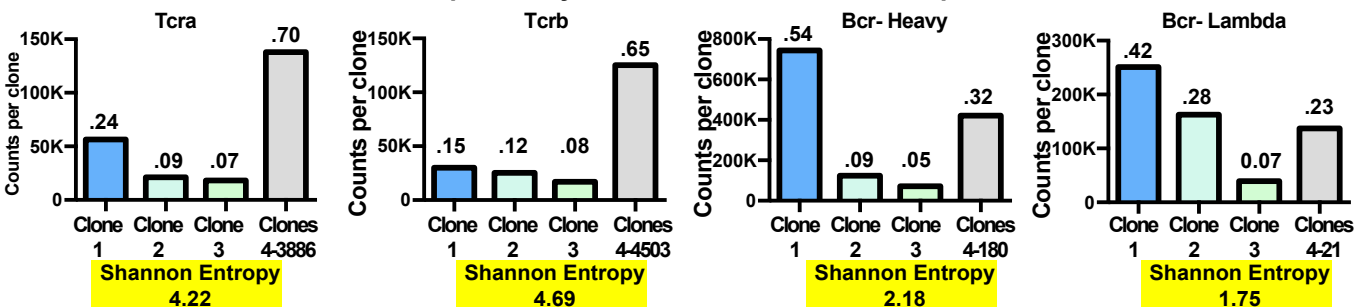

Supplement: NIHMS1542054-supplement-5.pdf [file NIHMS1542054-supplement-5.pdf]
