# Supplementary material
Source: PubMed Central journal article supplement (PMC6911685)
Supplement: NIHMS1542054-supplement-9.pdf [file NIHMS1542054-supplement-9.pdf]

| Table S1: Hazard Ratios of Survival Studies  |                   |                   |               |
|----------------------------------------------|-------------------|-------------------|---------------|
| Immune Checkpoint Therapy Experiments        |                   |                   |               |
|                                              | NT                | aPD1/aCTLA4       | Model         |
| Hazard Ratio (logrank)                       | 0.7413            | 1.349             | T11 Parent    |
| 95% CI of ratio                              | 0.3772 to 1.457   | 0.6863 to 2.651   |               |
| Hazard Ratio (logrank)                       | 6.817             | 0.1467            | T11-Apobec    |
| 95% CI of ratio                              | 2.481 to 18.74    | 0.05338 to 0.4031 |               |
| Hazard Ratio (logrank)                       | 5.326             | 0.1877            | T11uv         |
| 95% CI of ratio                              | 1.764 to 16.08    | 0.06219 to 0.5667 |               |
| Hazard Ratio (logrank)                       | 2.126             | 0.4703            | KPB25L Parent |
| 95% CI of ratio                              | 1.012 to 4.47     | 0.2237 to 0.9886  |               |
| Hazard Ratio (logrank)                       | 4.96              | 0.2016            | KPB25Luv      |
| 95% CI of ratio                              | 2.281 to 10.79    | 0.09268 to 0.4385 |               |
| Hazard Ratio (logrank)                       | 4.199             | 0.2381            | KPB25L-Apobec |
| 95% CI of ratio                              | 1.471 to 11.99    | 0.08343 to 0.6797 |               |
| Hazard Ratio (logrank)                       | 0.753             | 1.328             | 2153L         |
| 95% CI of ratio                              | 0.3844 to 1.475   | 0.6781 to 2.601   |               |
| Hazard Ratio (logrank)                       | 1.347             | 0.7425            | 2225L         |
| 95% CI of ratio                              | 0.6674 to 2.718   | 0.3679 to 1.498   |               |
| Hazard Ratio (logrank)                       | 0.9969            | 1.003             | 2336R         |
| 95% CI of ratio                              | 0.5581 to 1.781   | 0.5616 to 1.792   |               |
| Hazard Ratio (logrank)                       | 1.267             | 0.7895            | 2224L         |
| 95% CI of ratio                              | 0.6986 to 2.297   | 0.4354 to 1.431   |               |
| Hazard Ratio (logrank)                       | 1.103             | 0.9067            | 9263-3F       |
| 95% CI of ratio                              | 0.4008 to 3.035   | 0.3295 to 2.495   |               |
|                                              | NT                | aPD1              |               |
| Hazard Ratio (logrank)                       | 2.972             | 0.3365            | T11-Apobec    |
| 95% CI of ratio                              | 1.377 to 6.415    | 0.1559 to 0.7265  |               |
| Ratio (and its reciprocal)                   | 3.054             | 0.3274            | KPB25Luv      |
| 95% CI of ratio                              | 1.484 to 6.289    | 0.159 to 0.6741   |               |
|                                              | NT                | aCTLA4            |               |
| Hazard Ratio (logrank)                       | 3.824             | 0.2615            | T11-Apobec    |
| 95% CI of ratio                              | 1.76 to 8.307     | 0.1204 to 0.5682  |               |
| Ratio (and its reciprocal)                   | 2.452             | 0.4079            | KPB25Luv      |
| 95% CI of ratio                              | 1.183 to 5.079    | 0.1969 to 0.845   |               |
| Immune Cell Depletion/Inhibition Experiments |                   |                   |               |
|                                              | aPD1/aCTLA4       | aCD19/aPD1/aCTLA4 |               |
| Hazard Ratio (logrank)                       | 0.2494            | 4.009             | T11-Apobec    |
| 95% CI of ratio                              | 0.09804 to 0.6347 | 1.576 to 10.2     |               |
| Hazard Ratio (logrank)                       | 0.2492            | 4.012             | KPB25Luv      |
| 95% CI of ratio                              | 0.09158 to 0.6782 | 1.474 to 10.92    |               |
|                                              | aPD1/aCTLA4       | aCD20/aPD1/aCTLA4 |               |
| Hazard Ratio (logrank)                       | 0.2887            | 3.463             | T11-Apobec    |
| 95% CI of ratio                              | 0.09039 to 0.9223 | 1.084 to 11.06    |               |
| Hazard Ratio (logrank)                       | 0.2276            | 4.394             | KPB25Luv      |
| 95% CI of ratio                              | 0.08854 to 0.585  | 1.71 to 11.29     |               |
|                                              | aPD1/aCTLA4       | aCD8/aPD1/aCTLA4  |               |
| Hazard Ratio (logrank)                       | 0.498             | 2.008             | T11-Apobec    |
| 95% CI of ratio                              | 0.2464 to 1.006   | 0.9939 to 4.058   |               |
| Hazard Ratio (logrank)                       | 0.3428            | 2.917             | KPB25Luv      |
| 95% CI of ratio                              | 0.1464 to 0.8028  | 1.246 to 6.831    |               |
|                                              | aPD1/aCTLA4       | aCD4/aPD1/aCTLA4  |               |
| Hazard Ratio (logrank)                       | 0.09922           | 10.08             | T11-Apobec    |
| 95% CI of ratio                              | 0.01952 to 0.5043 | 1.983 to 51.22    |               |
| Hazard Ratio (logrank)                       | 0.1288            | 7.763             | KPB25Luv      |
| 95% CI of ratio                              | 0.03407 to 0.4869 | 2.054 to 29.35    |               |
|                                              | aPD1/aCTLA4       | aL21/aPD1/aCTLA4  |               |
| Hazard Ratio (logrank)                       | 0.3799            | 2.633             | T11-Apobec    |
| 95% CI of ratio                              | 0.1417 to 1.018   | 0.982 to 7.058    |               |
| Ratio (and its reciprocal)                   | 0.1556            | 6.428             | KPB25Luv      |
| 95% CI of ratio                              | 0.03465 to 0.6987 | 1.431 to 28.86    |               |
|                                              | aPD1/aCTLA4       | Igmi aPD1/aCTLA4  |               |
| Hazard Ratio (logrank)                       | 0.2056            | 4.863             | T11-Apobec    |
| 95% CI of ratio                              | 0.0438 to 0.9653  | 1.036 to 22.83    |               |
|                                              | aPD1/aCTLA4       | aCD16/aPD1/aCTLA4 |               |
| Hazard Ratio (logrank)                       | 0.4293            | 2.329             | KPB25Luv      |
| 95% CI of ratio                              | 0.1946 to 0.9471  | 1.056 to 5.139    |               |
|                                              | NT                | Isotype controls  |               |
| Hazard Ratio (logrank)                       | 1.144             | 0.8739            | T11-Apobec    |
| 95% CI of ratio                              | 0.5267 to 2.486   | 0.4023 to 1.898   |               |
| Hazard Ratio (logrank)                       | 0.8905            | 1.123             | KPB25L        |
| 95% CI of ratio                              | 0.4025 to 1.97    | 0.5075 to 2.485   |               |
