# Supplementary material
Source: PubMed Central journal article supplement (PMC6911685)

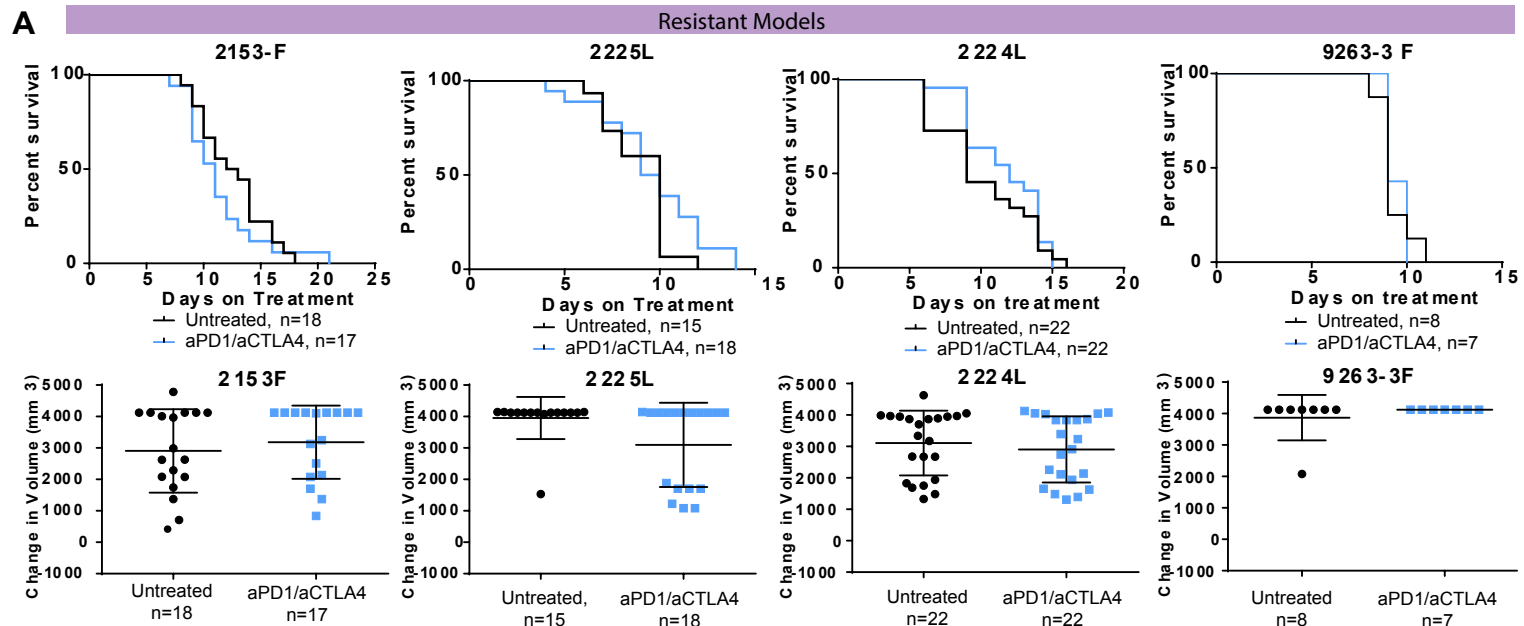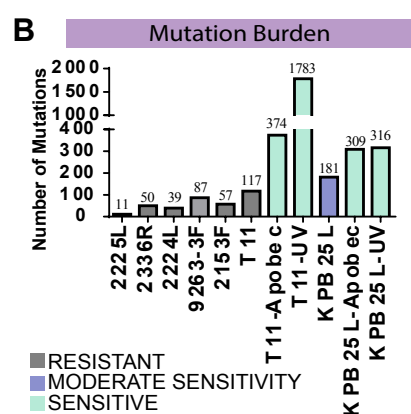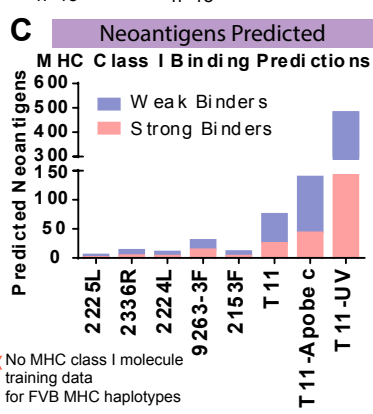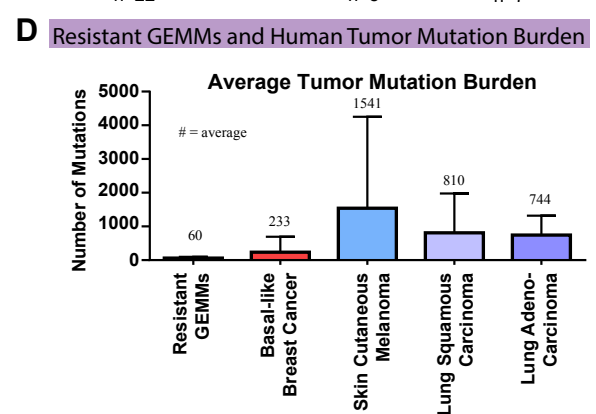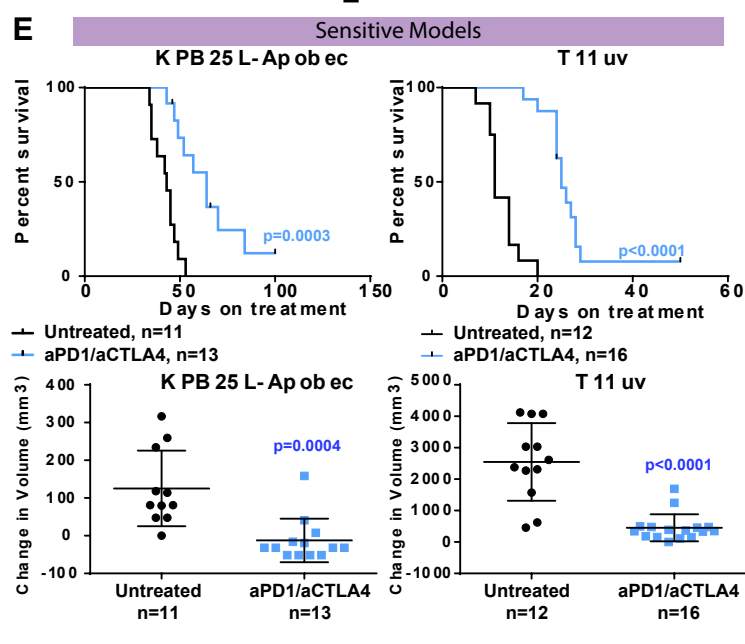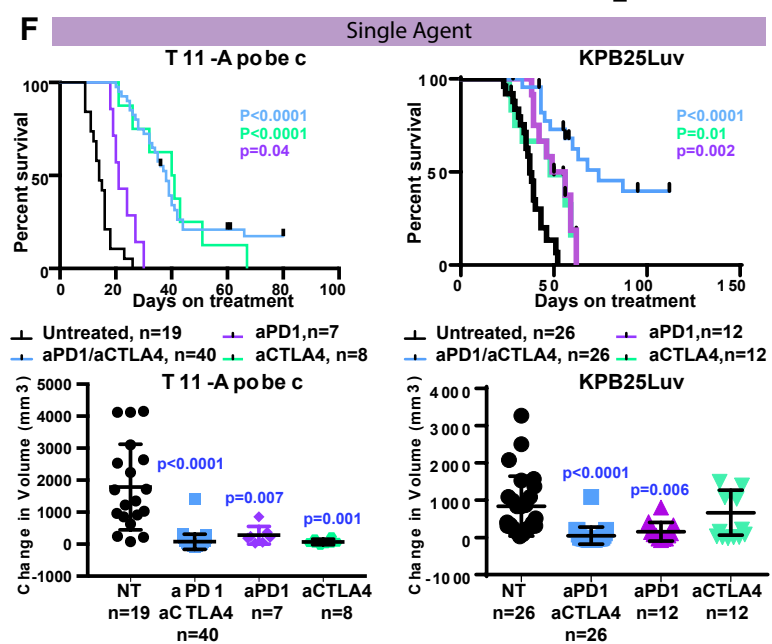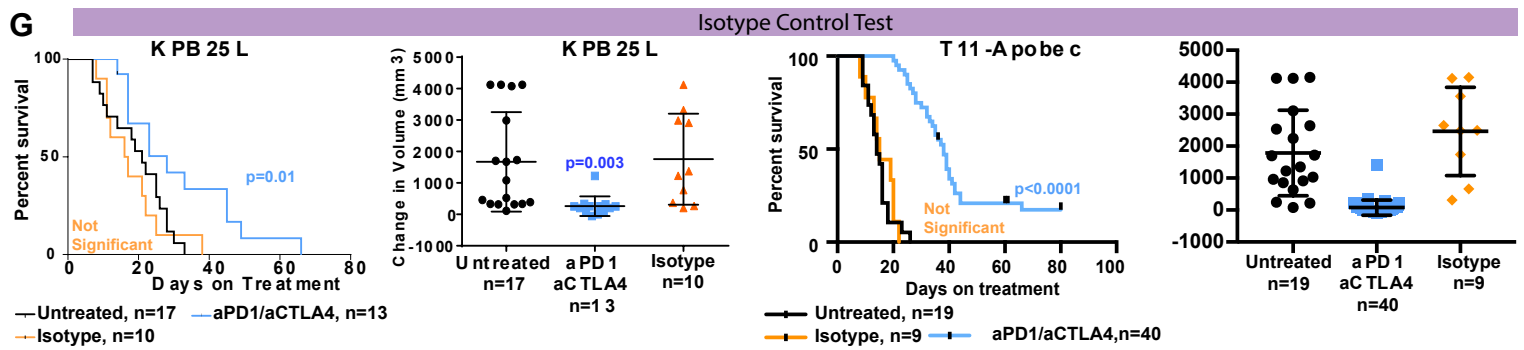

Supplement: NIHMS1542054-supplement-1.pdf [file NIHMS1542054-supplement-1.pdf]

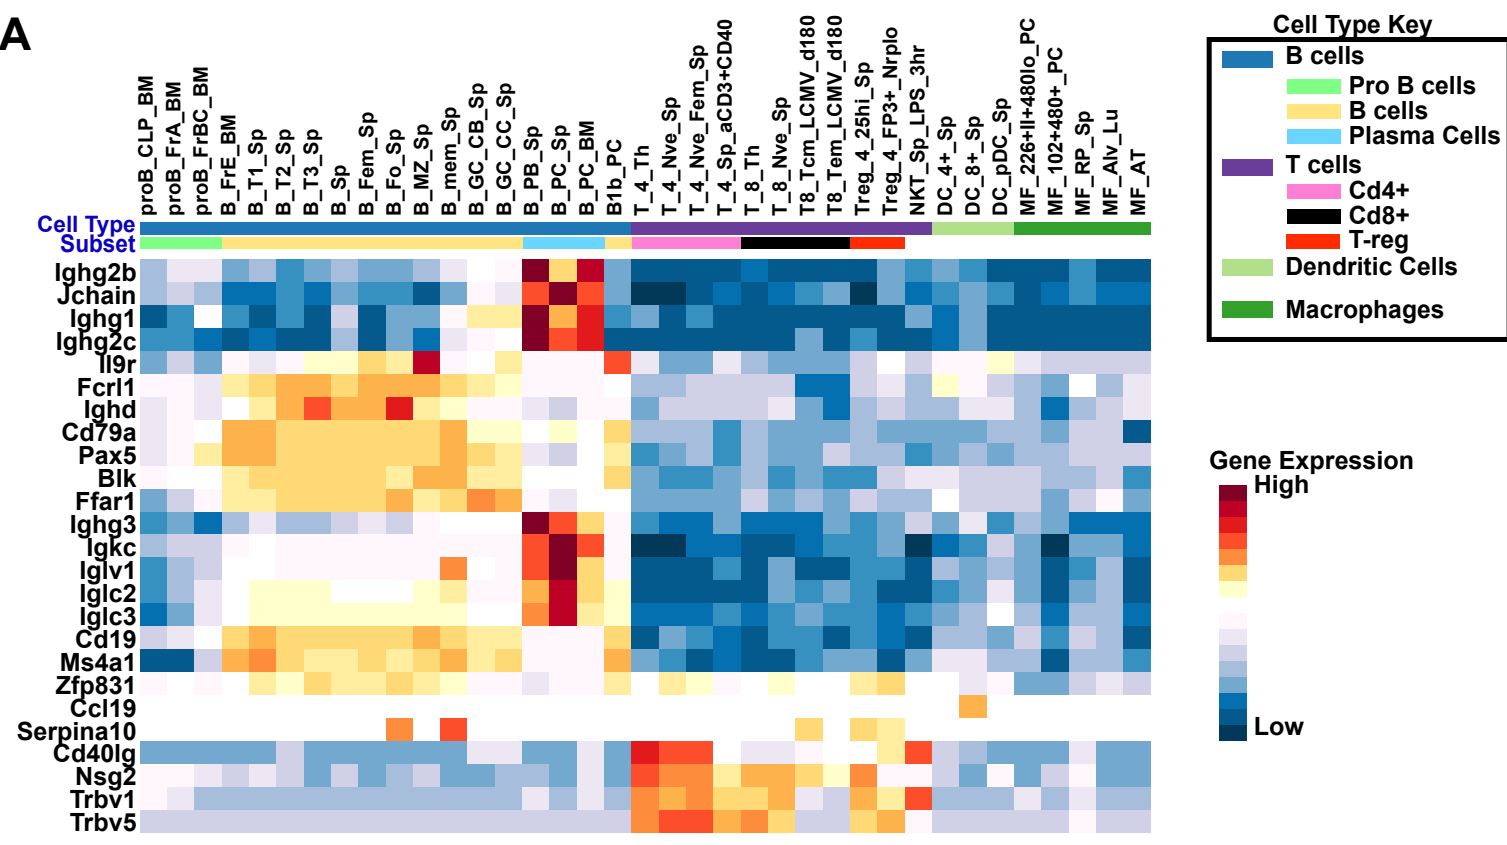

Immune Activity Signature Predictions

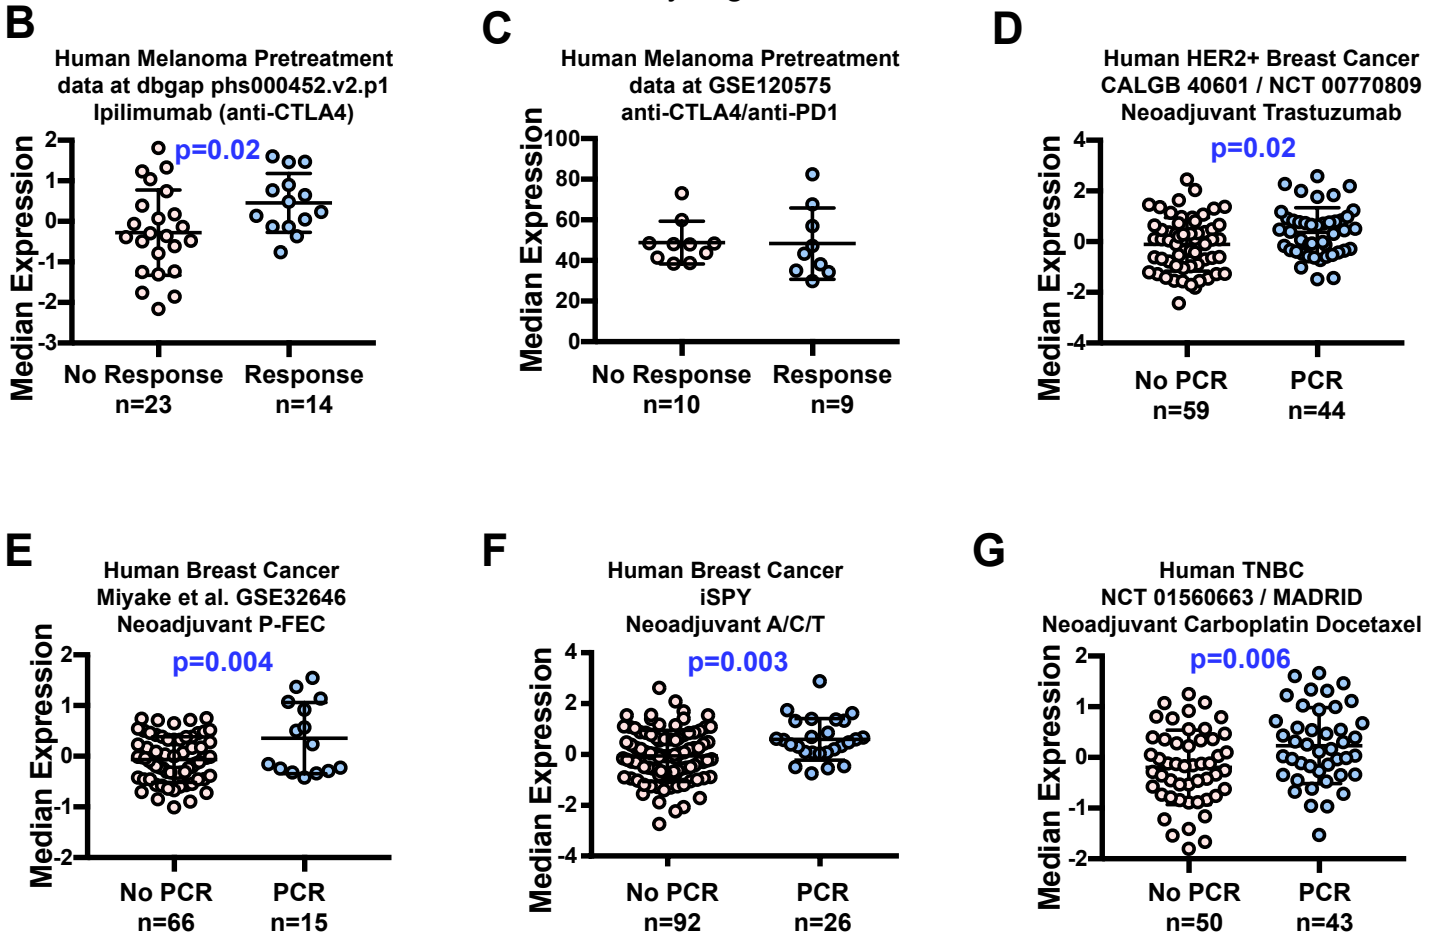

Supplement: NIHMS1542054-supplement-3.pdf [file NIHMS1542054-supplement-3.pdf]

# A T11-Apobec

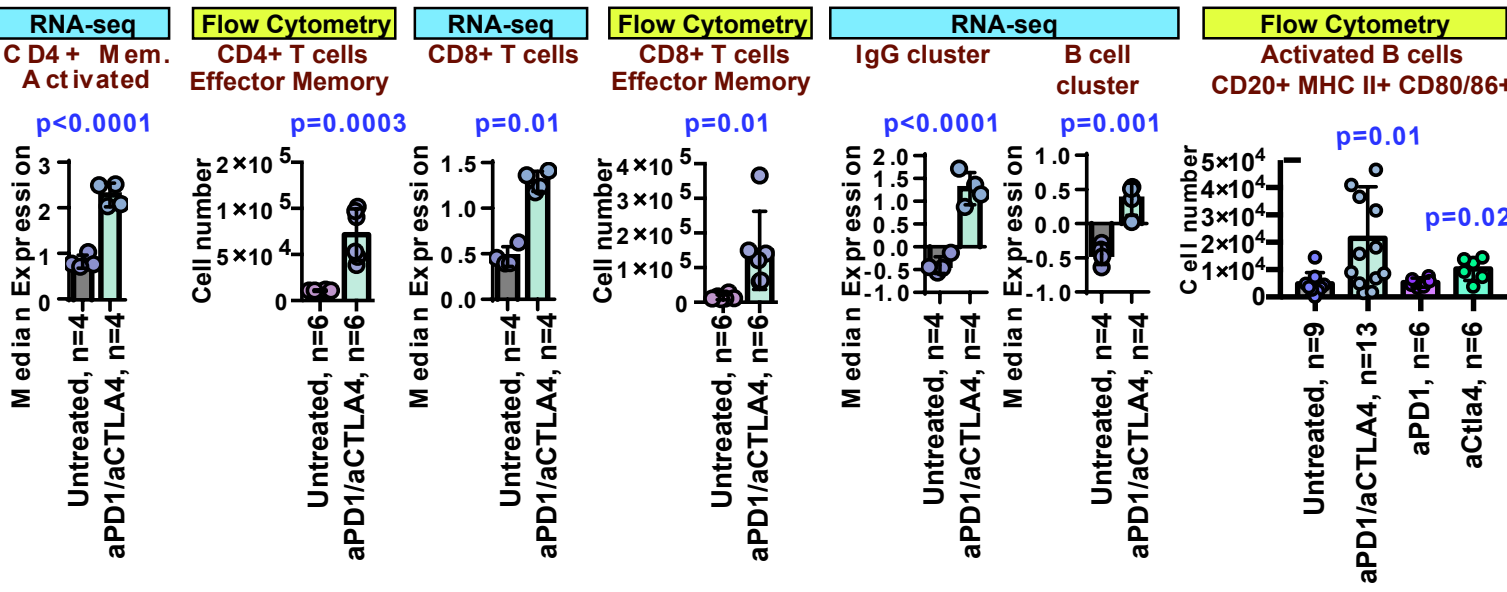

# B KPB25Luv

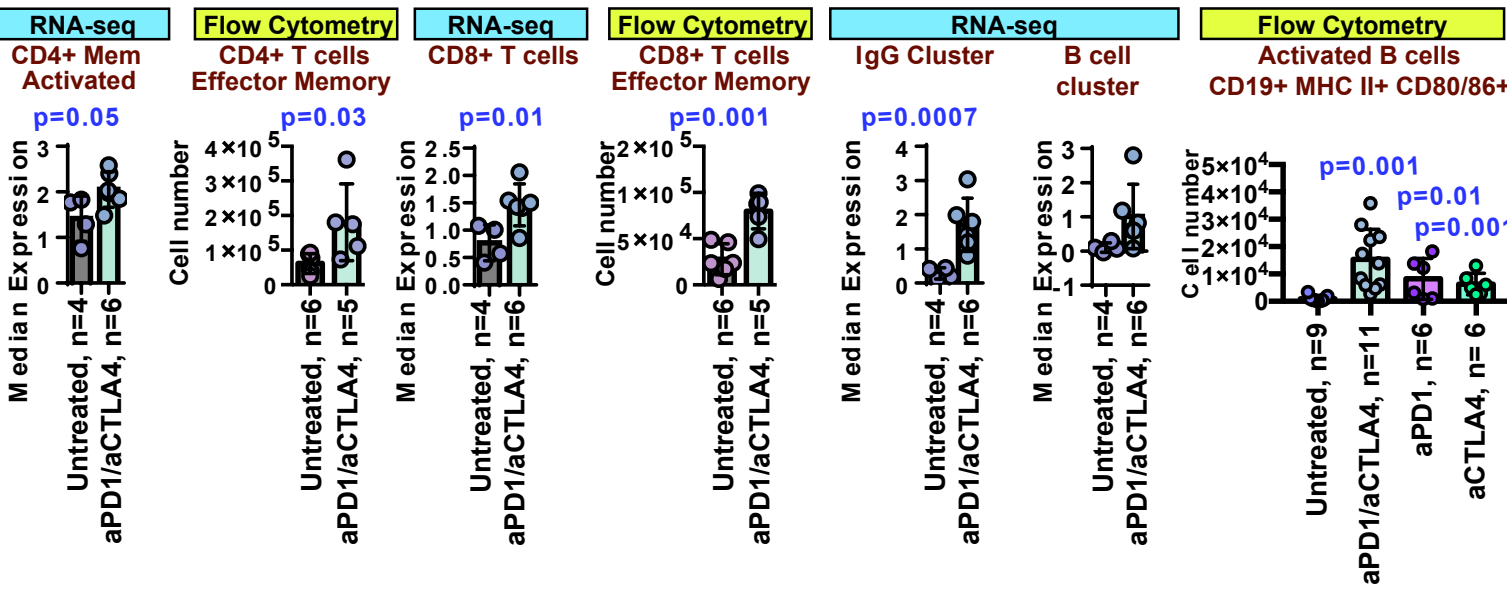

# C T11-UV

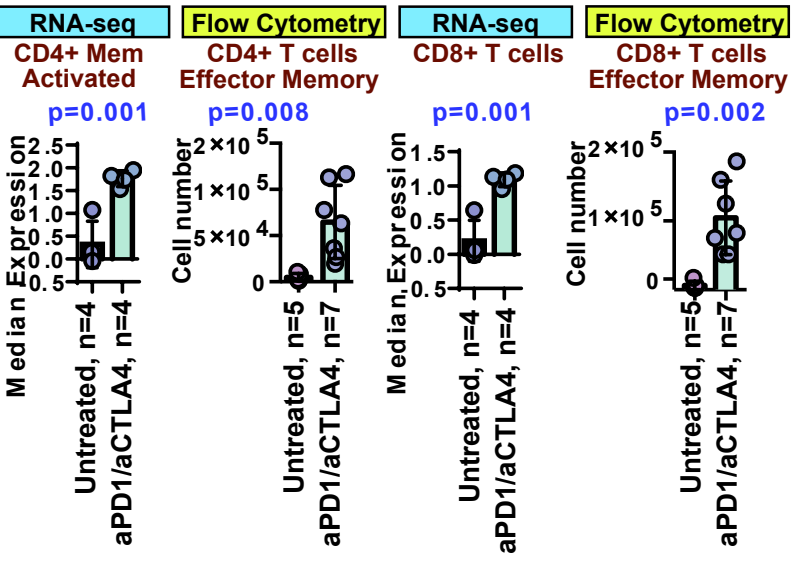

# D KPB25Luv

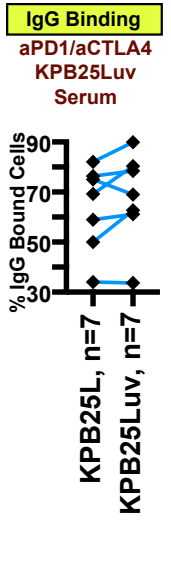

# E T11 v T11-Apobec

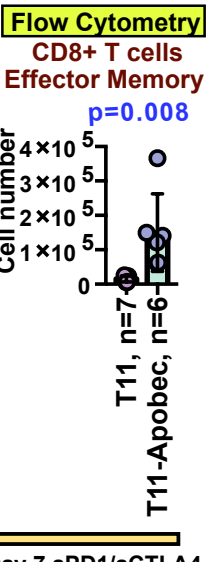

# F CD8 to T-reg Ratio

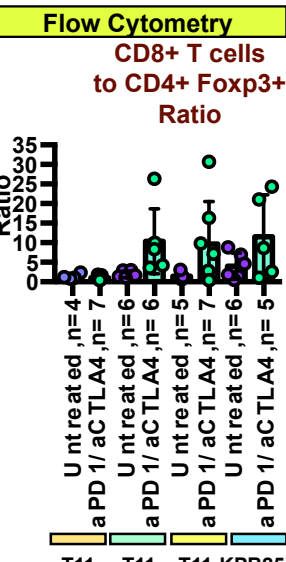

Supplement: NIHMS1542054-supplement-4.pdf [file NIHMS1542054-supplement-4.pdf]

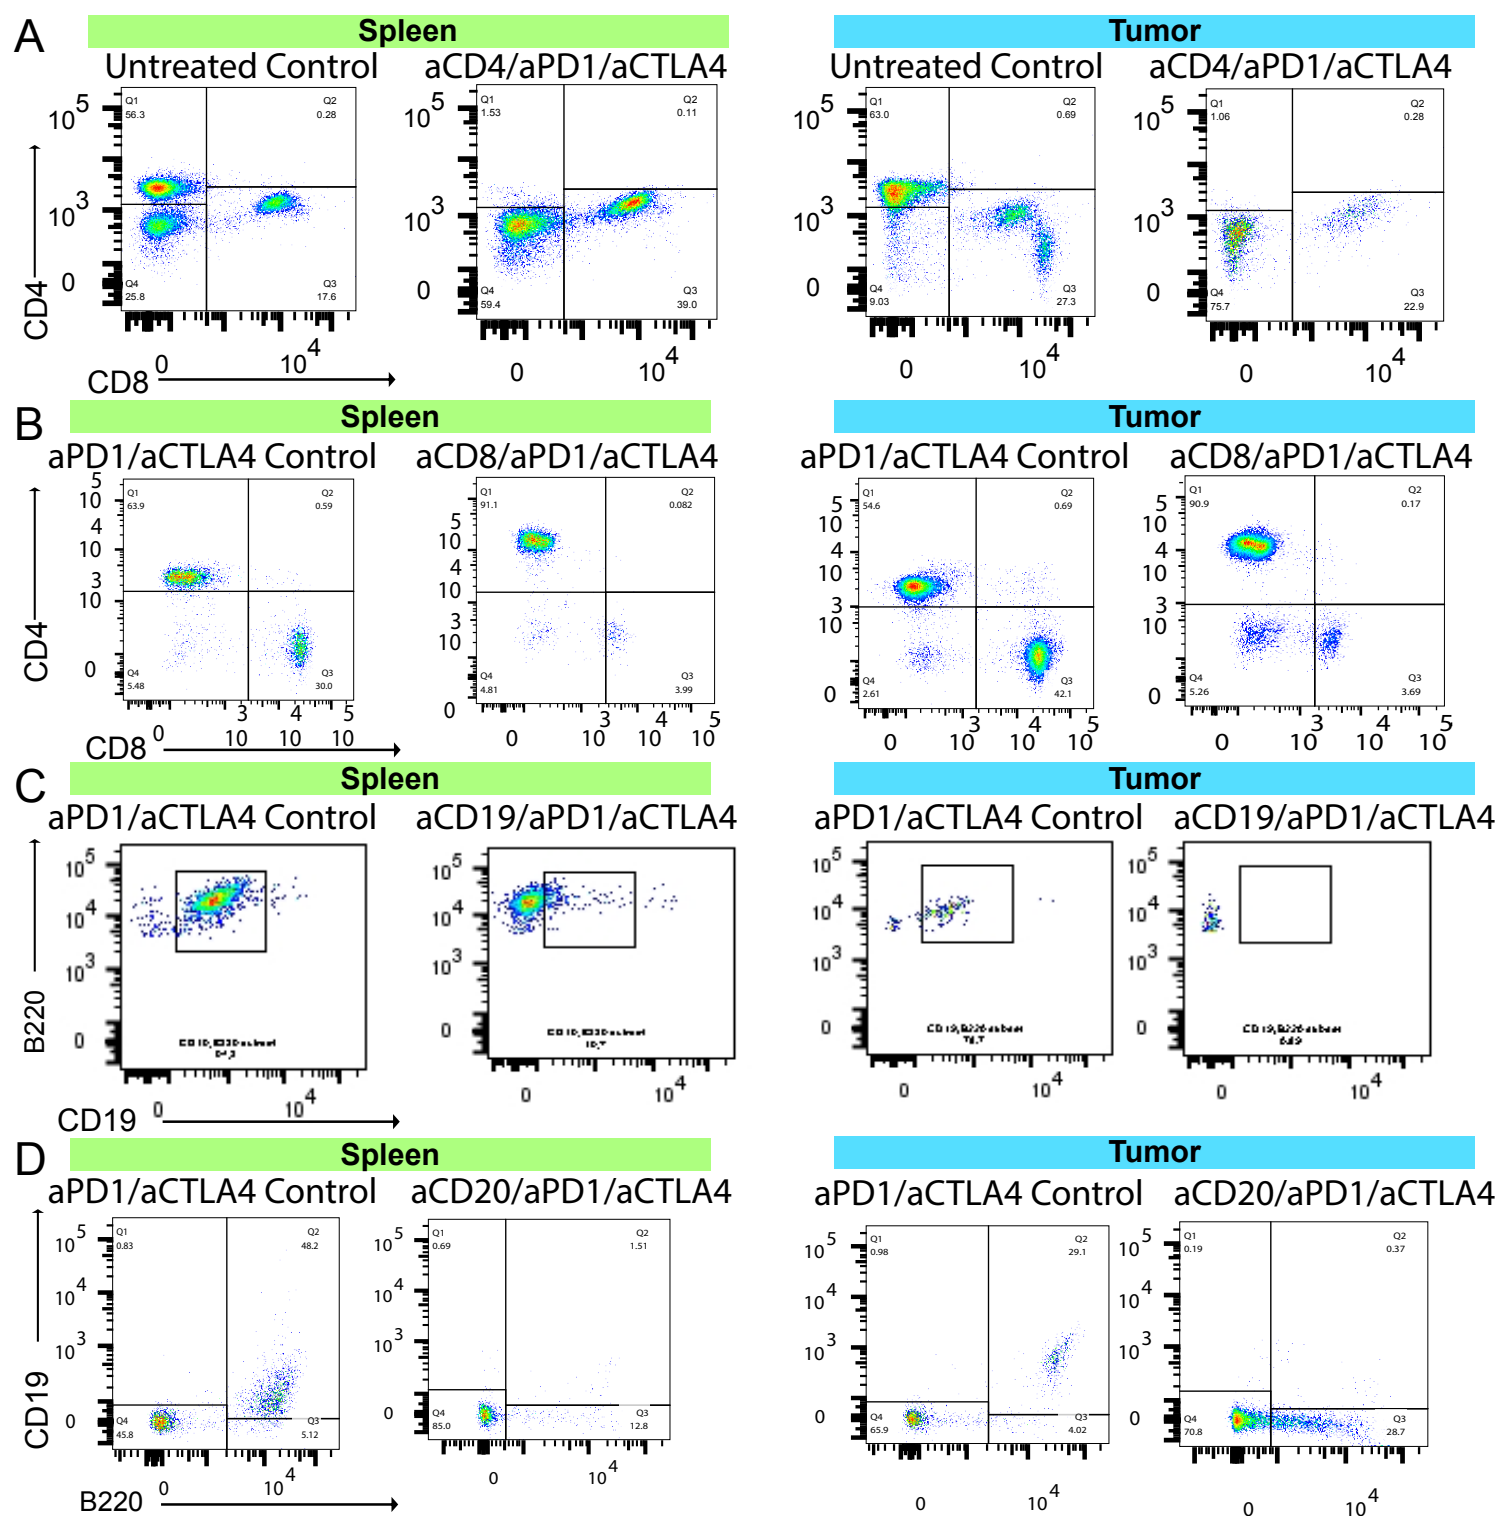

Supplement: NIHMS1542054-supplement-6.pdf [file NIHMS1542054-supplement-6.pdf]

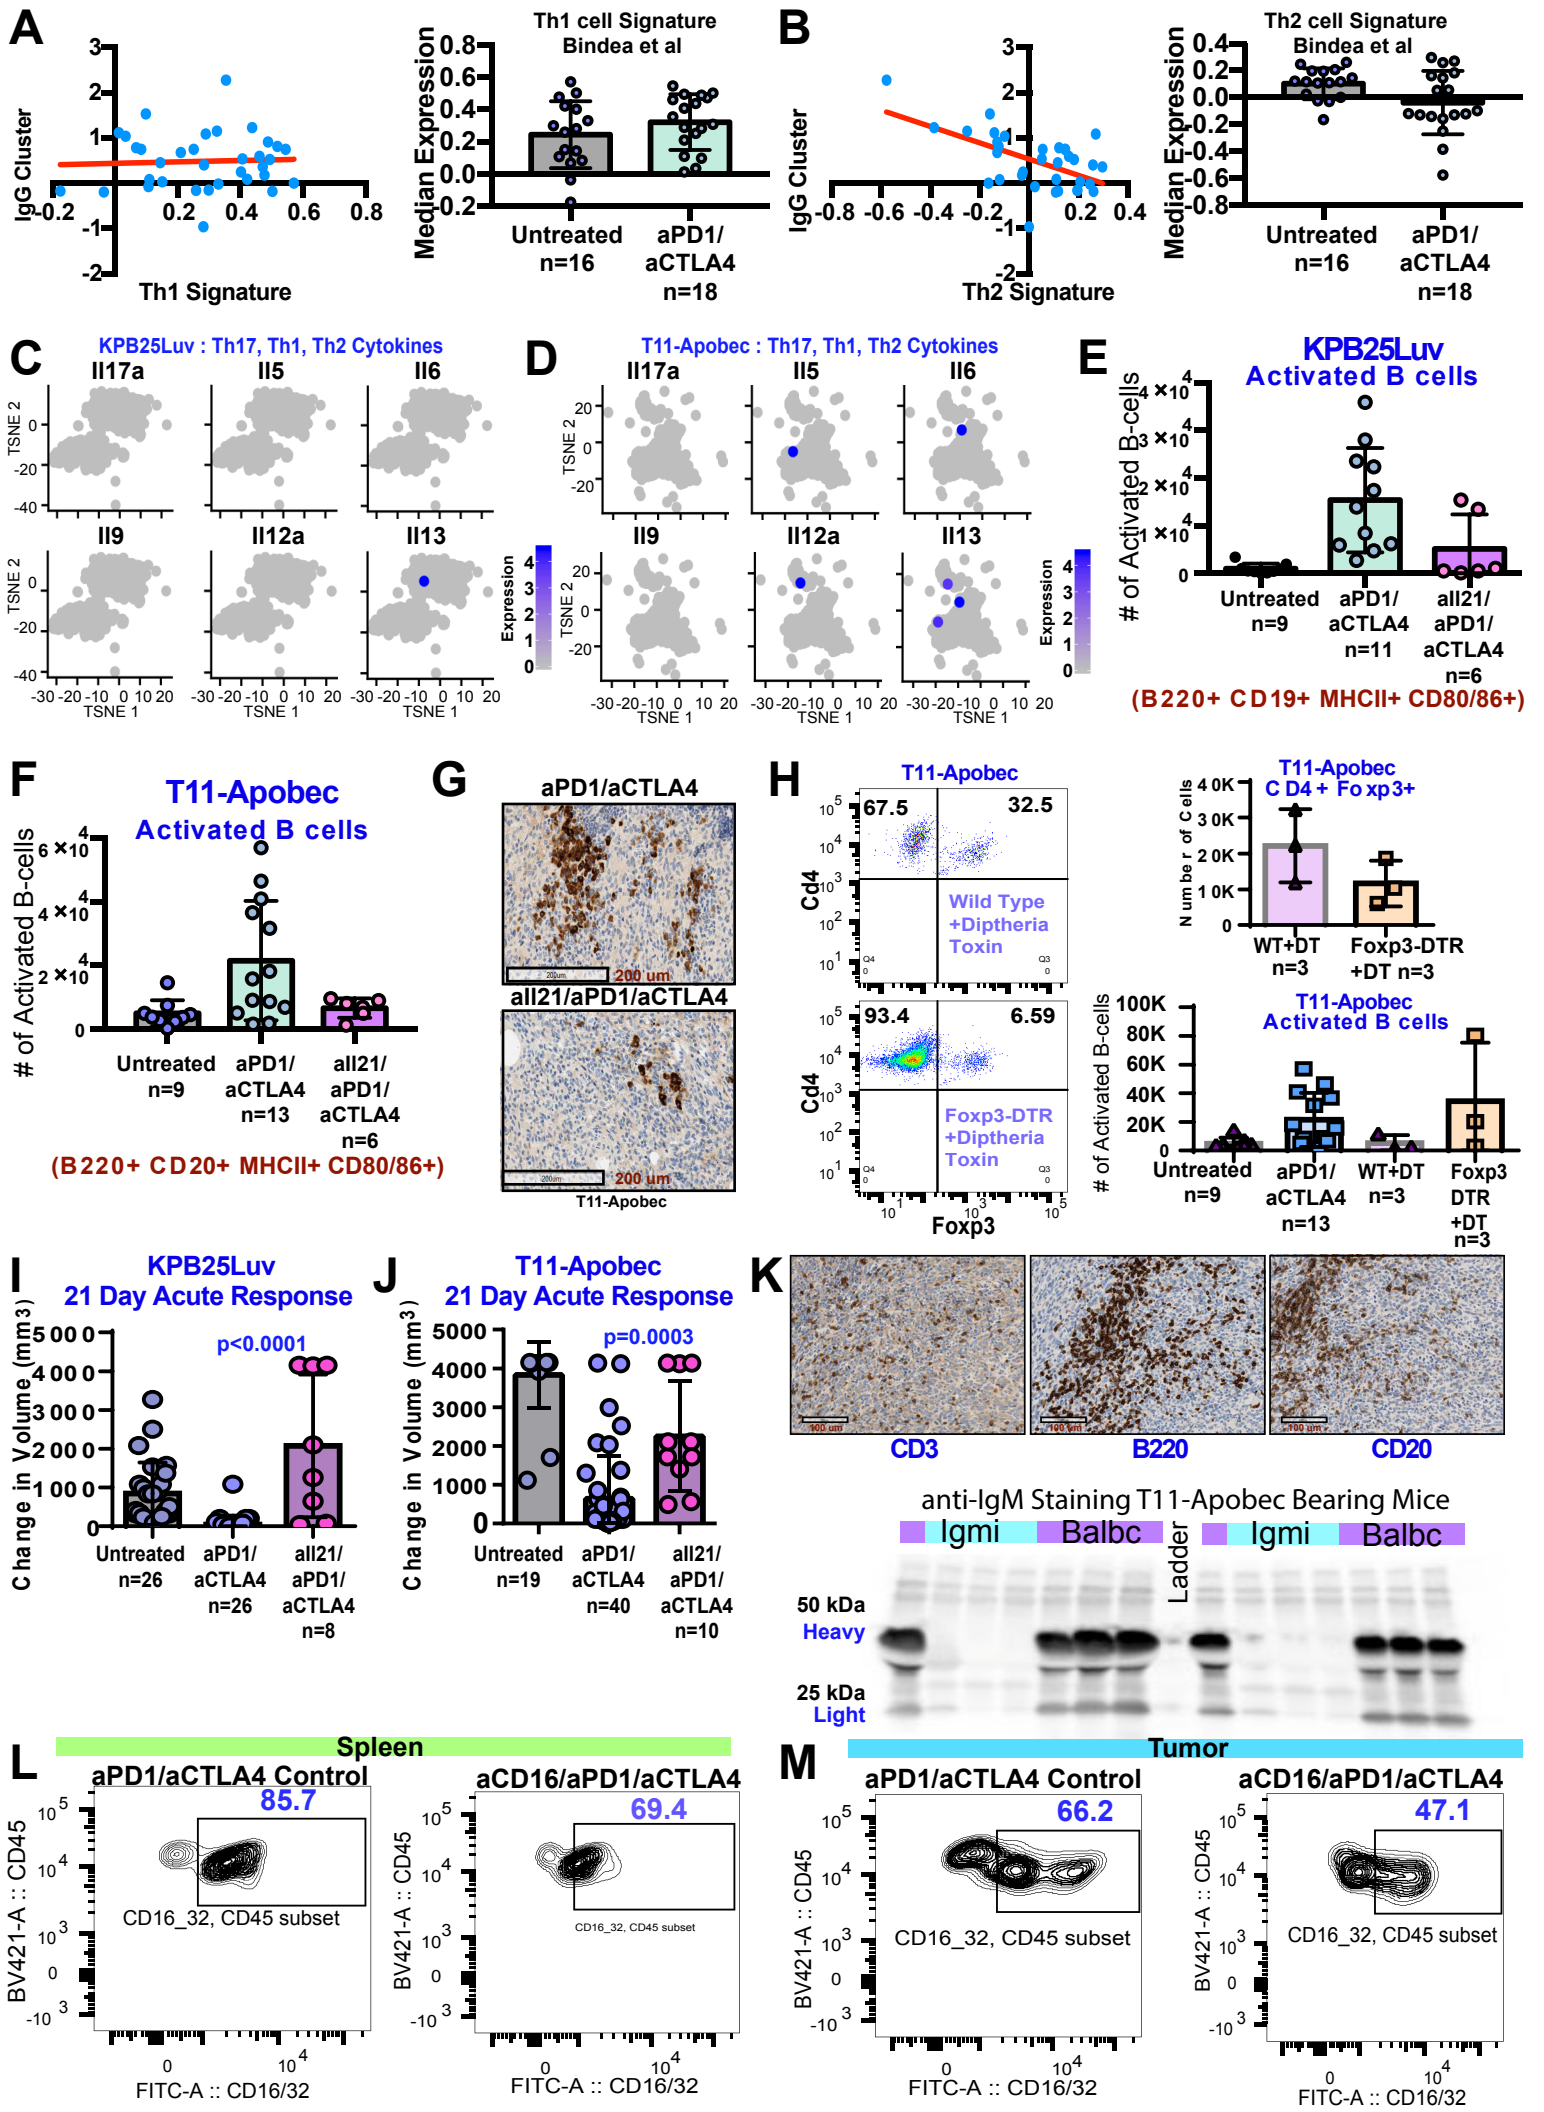

Supplement: NIHMS1542054-supplement-7.pdf [file NIHMS1542054-supplement-7.pdf]
